1 The genomic basis of evolved virus resistance is dependent on environmental  
2 resources

3

4 Katherine Roberts<sup>1¶</sup>, Sean Meaden <sup>1 ¶</sup>, Stephen Sharpe, Suzanne Kay, Toby Doyle, Drew  
5 Wilson, Lewis J. Bartlett<sup>4</sup>, Steve Paterson<sup>3</sup>, Mike Boots<sup>1,2\*</sup>

6

7 1. Biosciences, University of Exeter, Penryn Campus, UK. TR10 9FE

8 2. Integrative Biology, University of California, Berkeley, USA. CA 94720

9 3. Institute of Integrative Biology, University of Liverpool, UK. L69 7ZB

10 4. Department of Biology, Emory University, Atlanta, GA, 30322, USA

11 ¶ These authors contributed equally to this work

12 \* Corresponding author

13

14

15

16

17

18

19

20

21

22

23

24

25

## 26 **Abstract**

27

28 Parasites impose strong selection on their hosts, but the level of resistance evolved may be  
29 constrained by the availability of resources. However, studies identifying the genomic basis  
30 of such resource mediated selection are rare, particularly in non-model organisms. Here, we  
31 investigated the role of nutrition in the evolution of resistance to a DNA virus (PiGV), and  
32 associated trade-offs, in a lepidopteran pest species (*Plodia interpunctella*). Through  
33 selection experiments and whole genome sequencing we identify putative mechanisms of  
34 resistance that depend on the nutritional environment during selection. We find that the  
35 evolution of resistance is specific to diet, with adaptation to a low nutrition diet constraining  
36 resistance when challenged with the pathogen on a high nutrition diet. Resistance in a low  
37 nutrition environment is negatively correlated with growth rate, consistent with an  
38 established trade-off between immunity and development. Whole genome resequencing of  
39 the host shows that resistance mechanisms are highly polygenic and suggests evidence for  
40 trade-offs at the genetic level. Critically when populations evolve in high resource  
41 conditions, resistance is linked to metabolic and immune pathways, however it is more  
42 closely associated with cytoskeleton organisation when selected under low nutrition. Our  
43 results emphasise the importance of resources on the evolution of resistance.

44

## 45 **Introduction**

46

47 Parasites and pathogens impose strong selection on their hosts resulting in the evolution of  
48 a range of defence mechanisms. For example, invertebrates possess an effective innate  
49 immune system that is capable of fighting infections from a wide range of pathogens

50 (Kingsolver *et al.* 2013, Sackton *et al.* 2007, Viljakainen *et al.* 2015). Hosts can also use a  
51 range of pathways to prevent or tolerate infection, including behavioural or physiological  
52 changes (Raberg *et al.* 2009; Curtis *et al.* 2011, Lefevre *et al.* 2012). The host strategy most  
53 likely to evolve, or be maintained, will ultimately depend upon the resources available to the  
54 host, as resistance mechanisms are both costly to initiate and maintain (Cotter, Simpson,  
55 Raubenheimer, & Wilson, 2011; Knutie, Wilkinson, Wu, Ortega, & Rohr, 2017; Lochmiller &  
56 Deerenberg, 2000). Such resource availability can vary due to both temporal and spatial  
57 differences e.g. seasonality, population density and patchiness of resource availability, and  
58 in terms of the quantity and quality of required resources. A core component of resource  
59 availability is nutrition, which is likely to greatly impact the evolution of resistance to  
60 parasites. For example, greater resistance is predicted to evolve under higher resource  
61 environments for two reasons. Firstly, reduced competition for resources should allow  
62 organisms to invest more in resistance mechanisms. Secondly, higher resources can lead to  
63 greater population density and therefore greater transmission events and chance of  
64 infection, resulting in stronger selection for resistance (Lopez-Pascua & Buckling 2008;  
65 Gómez *et al.* 2015). Resistance mechanisms may also, in principle, be specific to host  
66 nutritional status, where a resource threshold is required for a resistance mechanism to be  
67 induced and functionally useful.

68

69 Such resistance mechanisms typically come at a price: either through the activation of  
70 induced defence mechanisms (Graham, Allen, & Read, 2005; Moret & Schmid-Hempel, 2000;  
71 Sadd & Siva-Jothy, 2006) or through the maintenance of a constitutively expressed defence  
72 when parasites are absent (Boots & Begon, 1993; Fuxa & Richter, 1992; Kraaijeveld &

73 Godfray, 1997; McKean, Yourth, Lazzaro, & Clark, 2008). Such costs may lead to the stable  
74 maintenance of polymorphism within a population (Antonovics & Thrall 1994; Juneja &  
75 Lazzaro 2009, Bowers, Boots & Begon 1994, Boots and Haraguchi 1999). Therefore,  
76 understanding how such mechanisms evolve, or are maintained, in controlled laboratory  
77 conditions is important for predicting the evolution of resistance in more variable wild  
78 populations. Here we examined the role of nutrition in the evolution of resistance to a DNA  
79 virus in its insect host in response to natural oral infection using an experimental evolution  
80 approach. We use the Indian Meal Moth, *Plodia interpunctella* and its naturally occurring  
81 granulosis baculovirus (PiGV) as a model system, where we have previously demonstrated  
82 that there is a resource-dependent cost to the evolution of resistance (Boots, 2011). Both  
83 the level of resistance attained and the associated costs depended on the selection  
84 environment, suggesting that different resistance mechanisms may be forced to evolve in  
85 different environments (Boots, 2011). We therefore evolve populations for multiple  
86 generations on two different nutritional environments, either in the presence or absence of  
87 the viral pathogen. We then tested the strength of the populations' resistances to the viral  
88 pathogen, and the larval development across the nutritional levels in order to quantify any  
89 potential trade-offs. Finally, we used whole-genome resequencing of populations to perform  
90 a genome scan for candidate resistance genes. Resequencing experiments are a powerful  
91 tool to identify the genetic basis of observed traits, including those involved in host-parasite  
92 interactions (Eoche-Bosy et al., 2017; Martins et al., 2014). To date many studies rely on  
93 model systems such as *Drosophila* and critically use only a single, often very high nutritional  
94 quality diet to identify the genetic basis of variance in traits of interest (Jha et al., 2015;  
95 Michalak, Kang, Sarup, Schou, & Loeschcke, 2017; Shahrestani et al., 2017; Turner & Miller,

96 2012). By studying multiple nutritional levels in a non-model organism we aim to tease apart  
97 the contribution of diet to resistance and any relevant trade-offs in a broader context.

98

## 99 **Materials and Methods**

100

### 101 **Selection Experiment**

102 Replicate selection lines of the Indian Meal Moth, *Plodia interpunctella* were set up at two  
103 different nutritional quantities, both in the presence and absence of a natural pathogen, the  
104 granulosis baculovirus PiGV. In order to establish genetically diverse and homogenous  
105 selection lines, we initially established a large outbred population of *Plodia interpunctella* by  
106 outcrossing existing laboratory strains with a number of populations received from the  
107 USDA. The initial set up of selection was based on the methods of (Boots, 2011). Briefly, for  
108 the virus selection lines PiGV was mixed into the food medium in which moths both feed on  
109 and reproduce within. Larvae become orally infected, which is the natural route of infection  
110 through ingesting the infective viral particles whilst they feed. There is therefore a strong  
111 selection pressure on all larvae across instar stages.

112         The resource-level quality of the moth's food is precisely controlled by the addition  
113 of methyl cellulose (an indigestible bulking agent) to the medium (Boots & Begon, 1994). The  
114 resource levels to establish our selection lines were determined based on (Boots, 2011). The  
115 basic food consisted of a cereal base (50% Ready Brek ©, 30% wheat bran, and 20% ground  
116 rice), brewer's yeast, honey, and glycerol (see supplementary for full methods for  
117 resources). To produce the two selection line food levels 10% of the mix was replaced with

118 methyl cellulose (MC) to give the high-quality resource level, and 55% food mix was replaced  
119 with MC for the low-quality diet.

120 Initially, 4 control (no virus) and 4 virus populations were established, on each of the two  
121 food resources. Sixty, 3-day post eclosion moths of mixed sex were placed in a 500ml  
122 Nalgene pot using an excess of each food mixture (200g). These 16 populations (4 x Control-  
123 Low food, 4 x Virus-Low food, 4 x Control-High food and 4 x Virus-High food) constituted one  
124 block of the experiment. This set up was repeated for 5 replicate blocks to give 20 separate  
125 populations of each of the potential selection regimes. All populations were maintained in  
126 incubators at 27°C, 16 Light :8 Dark cycle, and pots were rotated around the incubator in  
127 order to control of any effects of incubator position. The day of first eclosion of each pot was  
128 noted, and three days post this first eclosion moths were moved onto the next generation as  
129 a way controlling for the effect of food on developmental time and ensuring the median day  
130 of eclosion was always used to generate the parents of the next generation (Boots, 2011).  
131 The populations were maintained for 12 generations in this manner after which they were  
132 assayed for their viral resistance and life history traits.

133

#### 134 **Phenotypic assays**

135 After 12 generations all populations were relaxed from their selection regime. Populations  
136 were split onto two different food types; a high quality 0% MC food (common garden  
137 environment i.e. both high and low nutrition treatment populations were reared and  
138 assayed on a common diet with no addition of MC) or the food type that they had been  
139 selected on for the course of the experiment (10% MC or 55% MC). None of the food for this  
140 “relaxed” generation contained any virus but the population set up was otherwise the same

141 as for the selection regime. From these populations, second-generation (to avoid maternal  
142 effects), third-instar larvae were either bioassayed with a viral solution, to look at virus  
143 resistance, or allowed to develop individually for life history measures. Both assays were  
144 carried out in on individuals housed in a segmented 25 well petri dish with an excess of  
145 relaxed generation food. The infection assay followed the protocol of Boots & Roberts  
146 (2012) where third instar larvae were removed from each population and starved for two  
147 hours before being orally dosed with a freshly prepared virus solution diluted with distilled  
148 water, 0.1% Coomassie Brilliant Blue R dye (ingestion is indicated by the presence of blue  
149 dye in the gut) and 2% sucrose (to encourage feeding). For this experiment, each of the  
150 relaxed populations was dosed at 5 different virus concentrations, highest dose of  $2.5 \times 10^{-4}$  %  
151 virus solution to dye solution, with four further 1:10 dilutions. A control solution of the blue  
152 dye, sucrose solution was also used as a control for dosing protocol. Approximately 25 larvae  
153 were dosed at each dose of virus, from each population. Larvae were kept in incubators and  
154 the numbers of subsequently infected larvae were recorded as a binary response on visual  
155 inspection infected larvae are clearly visible because of their opaque white colour due to a  
156 build-up of viral occlusion bodies. As PiGV is an obligate killer, there is no tolerance to  
157 infection. We therefore refer to resistance here as the proportion of individuals surviving  
158 following viral challenge.

159 At the same time as the larvae for the infection assay were collected 25 larvae were  
160 again individually placed into the 25 well Petri dishes containing high quality resource and  
161 allowed to develop in standard incubators conditions. The time to pupation was checked  
162 daily and the day that a brown pupa was seen it was removed from its silk case and  
163 weighted and recorded.

164

## 165 **DNA extraction and Sequencing**

166 Our methods for studying the genetic basis of PiGV resistance was to use a ‘pool-seq’  
167 approach where individual larvae from a population are pooled and the subsequent  
168 extracted DNA is sequenced to generate estimates of allele frequencies within a population.  
169 This approach has been developed and validated in a number of papers (Kofler, Langmüller,  
170 Nouhaud, Otte, & Schlötterer, 2016; C Schlötterer et al., 2015; Christian Schlötterer, Tobler,  
171 Kofler, & Nolte, 2014) and is an efficient way of comparing large numbers of populations.  
172 Genomic DNA from each population was extracted using a Blood and Tissue DNA extraction  
173 kit (Qiagen, UK). First, 50 larvae from each population were fully homogenised in ATL lysis  
174 buffer, and after Proteinase-K digestion the max volume for the column was taken through  
175 for the rest of the extraction protocol. (25mg tissue was the max for the column and 180uL  
176 of lysate equated to 25mg of original tissue). In parallel, DNA was extracted from 8 individual  
177 larvae in order to generate a high confidence SNP dataset, using the QIAGEN Genomic-tip  
178 20/G standard protocol (Qiagen, UK). All samples were sequenced at the University of  
179 Liverpool from Illumina TruSeq Nano libraries with 350bp inserts using 125bp paired-end  
180 reads on an Illumina HiSeq2500 platform. Reads were quality filtered to remove adapter  
181 sequences, reads shorter than 10bp and reads with a minimum window score of 20 using  
182 cutadapt (version 1.2.1) (Martin, 2011) and Sickle (version 1.2 (Joshi & Fass, 2011)). Reads  
183 were mapped to the *Plodia interpunctella* reference genome (described here and available  
184 from LepBase.org) using Bowtie2. GATK’s HaplotypeCaller program was used to generate  
185 high confidence SNP markers from sequences obtained from individual larvae. Allele  
186 frequency counts were filtered to exclude SNPs with coverage greater than the median plus



187 3 standard deviations in order to exclude sequencing errors that could occur from mapping  
188 to collapsed repeats in the assembly. This SNP dataset was used as a reference dataset to  
189 generate allele frequencies at each marker per population using the pool-seq data using  
190 Samtools mpileup. Sequence data has been deposited in the ENA under accession number  
191 PRJEB27964. Additional sequencing was undertaken to improve the scaffold lengths of the  
192 assembly using a proximity ligation method at Dovetail Genomics (Santa Cruz, CA, USA). This  
193 method creates chromatin cross links on input DNA, followed by proximity ligation to mark  
194 the physical proximity of sequences to each other (Putnam et al., 2016).

195

#### 196 ***De novo* assembly and annotation of the *P. interpunctella* genome**

197 In order to reduce heterozygosity prior to genome assembly, a line of *Plodia* was generated  
198 by full-sib matings for 10 generations. DNA was extracted using Qiagen GenomeTip and used  
199 to make Illumina TruSeq PCR-free, paired-end libraries with insert sizes of c. 350bp, 450bp and  
200 600bp and sequenced on an Illumina MiSeq platform to generate c. 18Gbp of 2x250bp reads  
201 and c. 40Gbp of 2x100bp reads on the Illumina HiSeq2000 platform. Nextera mate-pair  
202 libraries with 3Kbp and 10Kbp insert sizes were sequenced on the Illumina 2000 platform with  
203 c. 50m pairs of 100bp reads from each library. Illumina polyA-ScriptSeq RNA libraries were  
204 prepared from 15 individuals and sequenced on the Illumina 2000 platform with c. 45m pairs  
205 of 100bp reads from each library. Illumina MiSeq reads were trimmed to Q $\geq$ 30 and adaptors  
206 removed using Sickle and Perl and assembled using Newbler (Roche GS-Assembler v2.6) with  
207 flags set for large genome and a heterozygote sample. Mate-pair reads were first mapped to  
208 these contigs using Bowtie2 (Langmead & Salzberg, 2012) to remove duplicates and wrongly  
209 orientated reads, and scaffolded into contigs using SSPACE (Boetzer, Henkel, Jansen, Butler,

210 & Pirovano, 2011). Gap filling was achieved using GapFiller for 2x 250bp and 2x 100bp paired-  
211 end reads and run for three iterations. RNAseq data were mapped to scaffolds within the  
212 assembled genome greater than 3Kbp using TopHat2 to identify transcribed regions and splice  
213 junctions. These, together with RNAseq data assembled using Trinity, were passed to the  
214 MAKER pipeline (Cantarel et al., 2008) to predict genes.

215

216

### 217 **Phenotypic data analysis**

218 To test the role of diet and exposure to PiGV resistance we used a linear mixed effect model.  
219 We used the proportion of surviving larvae at the median assay dose as the response term  
220 as this dosage exhibited the largest variance (0.042, Fig. 1A). All selection lines were assayed  
221 in both the common garden diet (with no MC replacement) or their respective selection diet  
222 (10% or 55% replacement). Selection treatment (PiGV exposure vs. control), assay diet  
223 (common garden vs. home) and selection diet (high vs. low) and interactions among these  
224 variables were fitted as fixed effects with block (population start date) included as a random  
225 effect and a binomial error structure applied. Checks of model residuals showed that the  
226 data conform to model assumptions. ANOVA was used to determine p-values following  
227 model simplification using AIC . Post-hoc comparisons were made using Tukey's all-pair  
228 comparison with p-values adjusted using the Holm-Bonferroni method. For the  
229 developmental data, a similarly structured model was applied, in this case including  
230 resistance as a fixed effect and mean growth rate (per population) as the response term.

231

### 232 **Pool-seq genome wide association test**

233 Association tests were run by iterating a binomial GLM on each SNP marker using the  
234 alternative and reference allele count as the response variable and the proportion of  
235 surviving larvae as the explanatory variable. P-values were computed using stepwise  
236 ANOVA. Any SNPs where a model failed to converge or that resulted in a regression  
237 containing data points with a Cook's distance greater than 1 were discarded. This resulted in  
238 a filtered dataset of ~450,000 and 250,000 SNPs (common garden diet and low nutrition  
239 respectively). P-values were corrected for a false discovery rate using the Benjamini and  
240 Hochberg correction and plotted across the length of the genome to identify regions  
241 associated with PiGV resistance. Genetic structure was assessed with the program Baypass  
242 using subsets of the data (49686 markers per group, 20 groups total) to assess FMD statistics  
243 (distance between covariance matrices, (Förstner & Moonen, 2003).

244

#### 245 **Putative function analysis**

246 Functional analysis of the candidate loci resulting from the association tests was conducted  
247 in two ways. Firstly, all genes containing associated SNPs were extracted and linked to the  
248 *Plodia interpunctella* predicted gene set. In this case significance was defined as  $P < 0.0001$   
249 after false discovery rate correction (Benjamini-Hochberg method) in order to reduce  
250 spurious matches. Orthologous genes between *P. interpunctella* and *Drosophila*  
251 *melanogaster* were identified using InParanoid (version 4.1). The resulting UniProt codes  
252 from matched genes were used for gene set enrichment analysis using the AmiGO service  
253 (<http://amigo.geneontology.org/amigo>) using Fisher's exact test. A second approach was to  
254 search the BLAST database directly for the best hits to the *P. interpunctella* genes of

255 interested. The resulting best hits were extracted and used to search the UniProt database  
256 for gene ontology terms and functional characterizations.

257

## 258 **Results**

259

### 260 *Evolution of resistance to PiGV is diet dependent*

261

262 By comparing virus (PiGV) exposed and unexposed controls selection treatments across  
263 multiple diets, we can test a number of specific hypotheses regarding the role of nutrition on  
264 resistance evolution. For example, comparing exposed and unexposed controls on their  
265 local diet (high or low nutrition) tests whether resistance evolved during the selection  
266 experiment. Testing these same populations on a common garden diet tests whether any  
267 evolved resistance mechanisms work across environments. A comparison of unexposed  
268 controls on a common garden diet allows us to test an effect of diet itself in shaping  
269 resistance. Finally, comparing exposed populations selected on a high or low nutrition diet  
270 and assayed on a common garden diet tests whether there is a difference in effectiveness  
271 between diet-specific resistance mechanisms.

272

273 In order to answer these questions, we first assessed resistance to PiGV across all diets and a  
274 gradient of doses in order to identify the dosage that maximized variation (Fig. 1A, stock  
275 dilution of  $2.5e-06$ ). At this dosage we found a strong three-way interaction between the  
276 selection diet, assay diet and the selection treatment (exposure to the virus vs. control) on  
277 resistance (GLMM,  $\chi^2_9 = 16.03$ ,  $p < 0.001$ , Fig. 1B). To understand the drivers of this effect we

278 used post-hoc testing to compare survivorship among the contrasts that test the hypotheses  
279 outlined above (Table 1).

280

| contrast                                          | estimate     | SE          | d.f.       | z-ratio      | p value       |
|---------------------------------------------------|--------------|-------------|------------|--------------|---------------|
| Exposed High vs. Control High on High assay       | 0.30         | 0.17        | Inf        | 1.71         | 0.2612        |
| Exposed Low vs. Control Low on Low assay          | -0.14        | 0.16        | Inf        | -0.86        | 0.7822        |
| Exposed High vs. Control High on C.G. assay       | -0.35        | 0.18        | Inf        | -1.93        | 0.2154        |
| <b>Exposed Low vs. Control Low on C.G. assay</b>  | <b>0.57</b>  | <b>0.16</b> | <b>Inf</b> | <b>3.51</b>  | <b>0.0022</b> |
| <b>Control High vs. Control Low on C.G. assay</b> | <b>-1.02</b> | <b>0.16</b> | <b>Inf</b> | <b>-6.32</b> | <b>0.0000</b> |
| Exposed High vs. Exposed Low on C.G. assay        | -0.09        | 0.18        | Inf        | -0.51        | 0.7822        |

P value adjustment: Holm-Bonferroni method for 6 tests.

281

282 We found the largest effect to be driven by diet itself, for example when comparing just  
283 unexposed control populations we find that those selected on a high nutrition diet produce  
284 larvae more likely to survive when facing viral challenge on a common garden diet (Table 1.;  
285 Fig. 1). This is interesting as it suggests a trade-off between being able to survive in a  
286 nutritionally limited environment and resistance to a parasite.

287

288 Secondly, we found that larvae from populations exposed to PiGV and selected on a low  
289 nutrition diet showed greater survival than their counterpart controls, but only when  
290 assayed on the common garden diet (Fig 1, panel A). This suggests that the method of  
291 resistance being employed by populations evolved in the two environments is different  
292 across the environments. It is interesting to note that we did not observe any difference  
293 between larvae from exposed and unexposed populations who were selected on a low

294 nutrition environment, when we assayed them on nutrient limited food. Yet the clear  
295 difference on the common garden diet suggests there is selection on resistance between  
296 these populations. We also did not identify any differences between exposed and control  
297 populations from the high nutrition treatment (Fig. 1, panel A). This suggests that the  
298 differences seen in the low nutrition treatments may potentially be the result of a loss of a  
299 costly resistance mechanism that is non-functional in a low nutrient environment.  
300

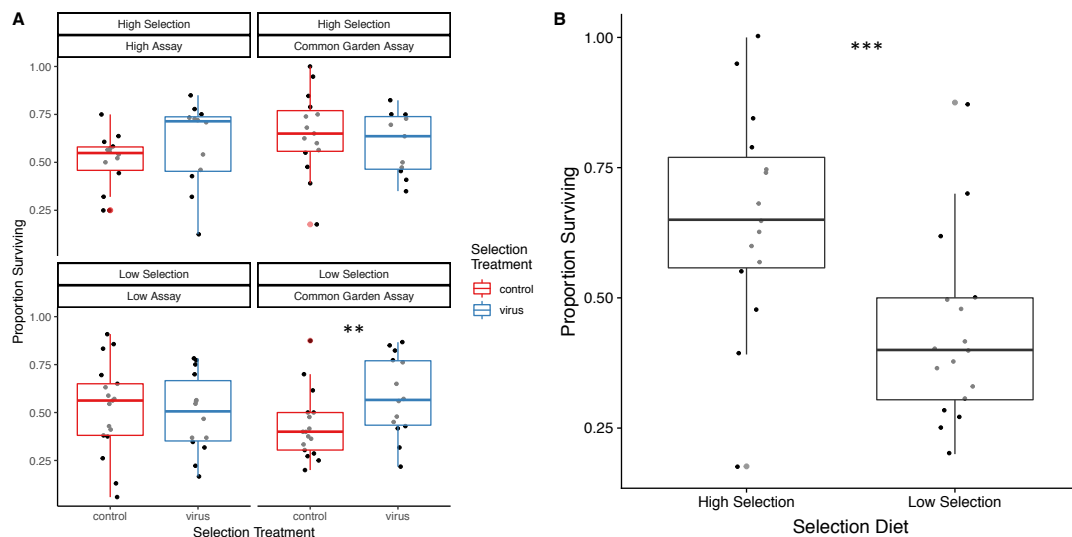

301

302

303

304 Figure 1.

305 A) Resistance of larval populations when assayed on the diet they were selected on, high

306 nutrition or low nutrition (selected), or a common garden diet. B) Resistance of control

307 populations on their selected diets at the median dose of PiGV.

308

309 *Diet determines developmental trade-offs*

310

311 To assess the effects of diet and PiGV exposure on growth rate we assayed all populations  
312 on the diet they were evolved on and a common garden diet, as in the resistance assays. We  
313 found no significant interactions between assay diet, selection diet, and population  
314 exposure, but did find significant independent effects of assay diet and population exposure  
315 (i.e. no effect of selection diet) (Fig. 2). Assay diet had the largest effect on growth rate with  
316 the fastest growth rates occurring on the common garden diet compared to selected diets  
317 ( $\chi^2 = 157.06$ ,  $df = 6$ ,  $p < 0.0001$ ). There was also a significant effect of PiGV exposure during  
318 selection, with populations selected for virus resistance exhibiting quicker growth rates than  
319 control populations ( $\chi^2 = 5.05$ ,  $df = 6$ ,  $p < 0.025$ ), which is counter to the trade-off observed  
320 previously in this system (Boots, 2011).

321

322 As we observed wide variation in growth rates within selection treatments we correlated the  
323 mean growth rate of each population to resistance on either their selected or common  
324 garden diet irrespective of selection treatment. In this case, we found a strong negative  
325 correlation between resistance and growth rate for the low nutrition populations on their  
326 selected diet ( $\chi^2 = 7.35$ ,  $df = 6$ ,  $p = 0.0067$ , Fig.2), but no directional correlation for the high  
327 nutrition populations on their selected diet ( $\chi^2 = 0.028$ ,  $df = 6$ ,  $p = 0.866$ , Fig. 2). On the  
328 common garden diet we found a significant interaction between measured resistance and  
329 selection diet (high or low nutrition) as predictors of growth rate ( $\chi^2 = 4.72$ ,  $df = 7$ ,  $p =$   
330  $0.0298$ , Fig. 2). This demonstrates that the nutritional environment larvae are selected on  
331 leads to fundamentally different costs of resistance. In this experiment low nutrient  
332 environments selected for a form of resistance that is traded off with growth rate, whereas  
333 in the high nutrient environment selection for resistance came at no cost to growth rate.

334

335

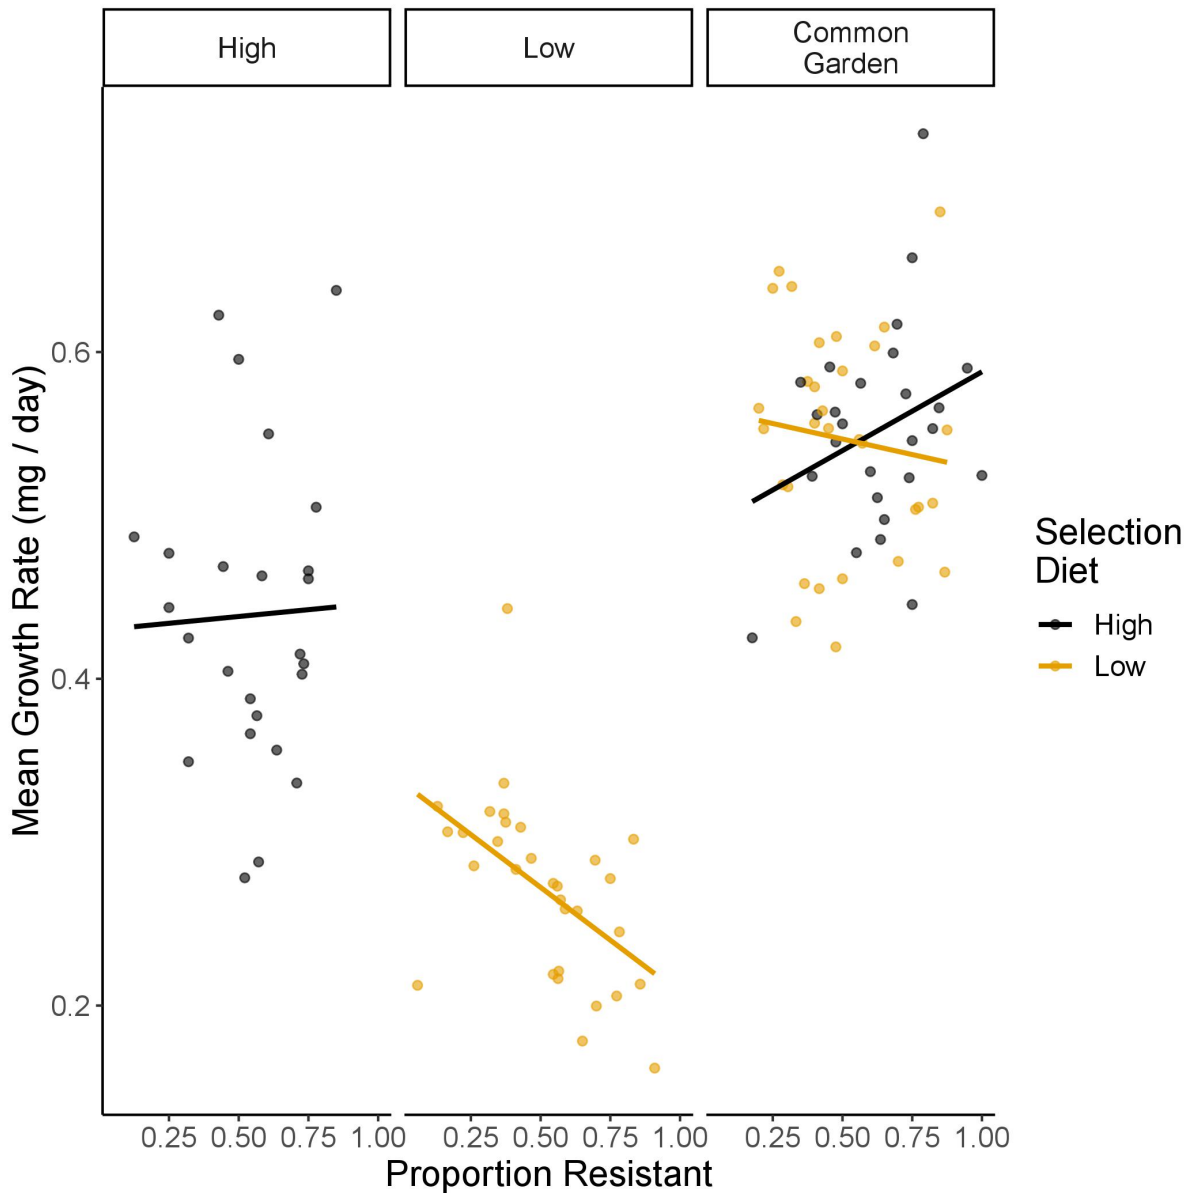

336

337

338 Figure 2.

339 Nutrient dependent trade-offs between mean population growth rate and resistance under  
340 all diets. Points represent raw data and lines are model predictions. Yellow points denote  
341 larval populations selected on a low-nutrition diet, whilst black denote populations selected  
342 on a high nutrition diet. Both resistance and growth rate are population level estimates  
343 based on either survivorship or development assays of 25 larvae per population.

344

345 *Identifying the genomic basis of resistance*



346 To identify the genomic basis of resistance to PiGV infection we employed a genome wide  
347 scan in order to associate specific loci with resistance. This method tests the association  
348 between allele frequency at each SNP present in our dataset and the resistance of each  
349 population. We first assessed SNPs that predicted resistance on a common dietary  
350 background i.e. the proportion of surviving larvae when assayed on the common garden  
351 diet. We identified a number of candidate SNPs that were strongly correlated with  
352 resistance (Fig. 3). Whilst these SNP markers were strongly correlated with PiGV resistance-  
353 required by the association test used, they were not correlated with development.  
354

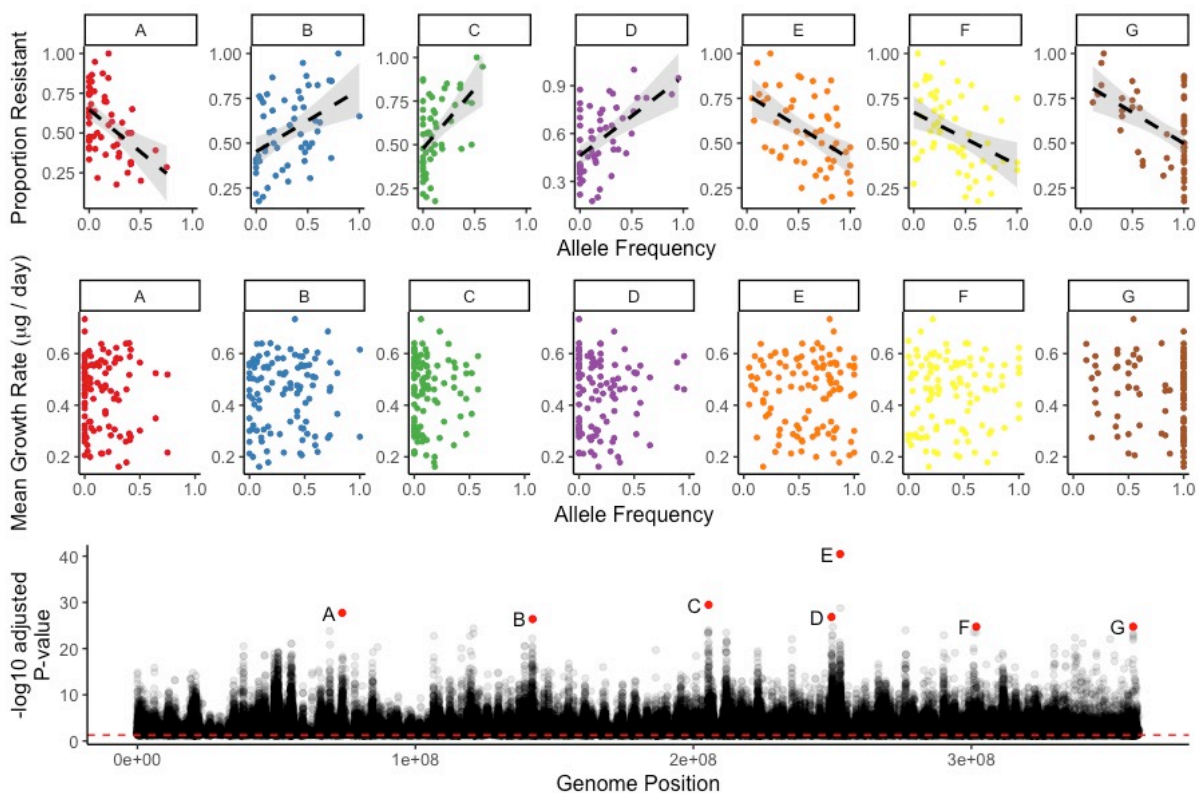

355  
356 Fig 3. Whole genome scan for SNPs associated with PiGV resistance, regardless of diet  
357 (bottom panel). By definition of the methods used for the association test, the allele  
358 frequency of these SNPs must be correlated with resistance (top panel). No correlations are  
359 seen between allele frequency and growth rate (middle panel).  
360

361 Whilst assessing the correlations of individual SNPs is useful for identifying strong effect loci,  
362 identifying such a large number of SNPs across many scaffolds is suggestive of a polygenic  
363 trait and therefore enrichment analyses may be more appropriate for functional inference.  
364 Following gene set enrichment analysis, we found that the gene ontology term most  
365 overrepresented was calcium ion homeostasis (15-fold enrichment). Neuromuscular  
366 synaptic transmission and immune response pathways were also overrepresented and  
367 showed 8 and 7-fold enrichments respectively (Fig. 4).  
368

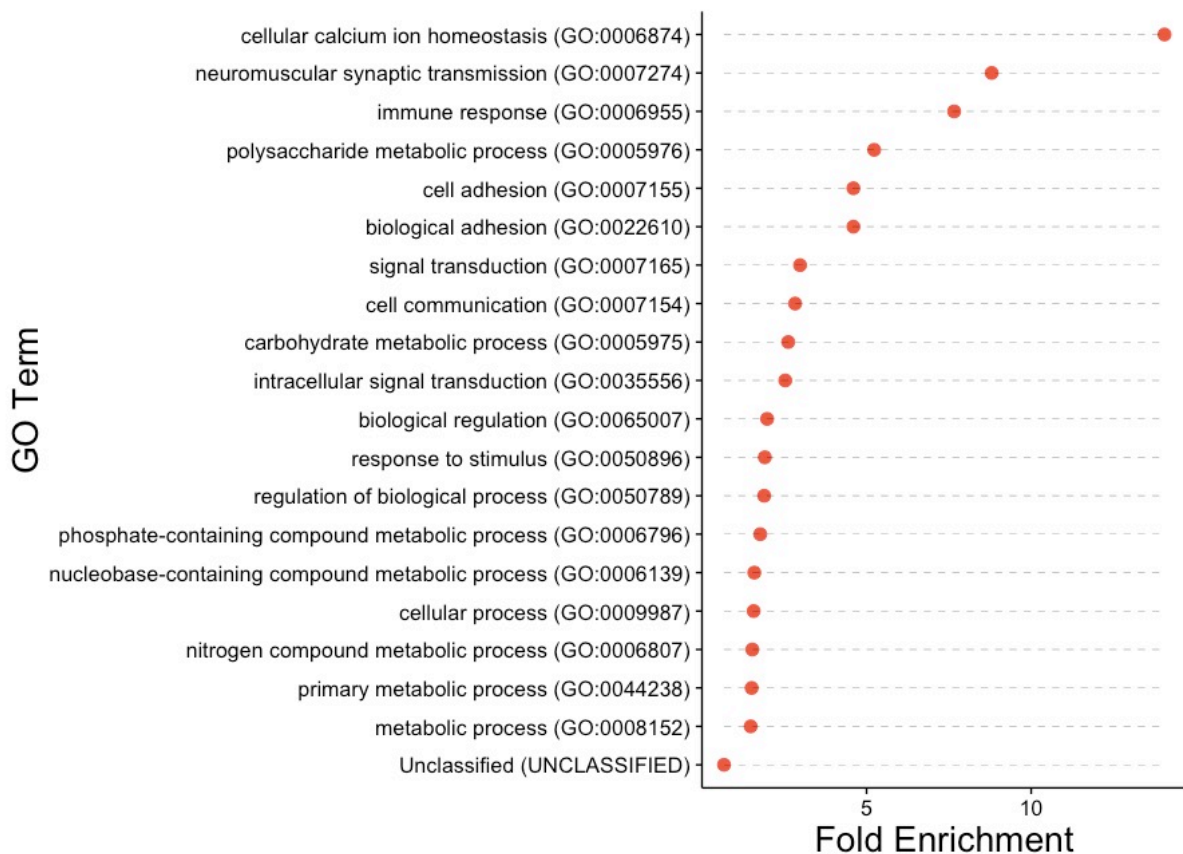

369  
370 Figure 4.  
371 Gene ontology terms significantly overrepresented in the SNPs associated with PiGV  
372 resistance in larvae assayed on a common garden diet.  
373

374 *Diet-specific resistance mechanisms*

375 Our phenotypic data provided strong evidence that resistance evolves in an environmentally  
376 dependent manner, suggesting distinct genomic routes to resistance under specific  
377 nutritional conditions. This was particularly the case when we examined populations evolved  
378 on a nutrient limited diet but assayed on a high resource, common garden diet. In this  
379 situation, control populations exhibited much lower resistance than exposed populations. To  
380 identify the mechanism that provided this difference in resistance we repeated the  
381 association test for this subset of populations. Again, we found a large number of SNPs  
382 strongly correlated with resistance, suggesting a polygenic trait. Enrichment analyses were  
383 used to categorise these markers into biologically meaningful processes. In this case,  
384 different pathways were over-represented compared to the previous analysis that compared  
385 resistance on each population's respective selection diet. For populations selected on a low  
386 nutrition diet but assayed on the common garden diet, cytoskeleton organization had a 5-  
387 fold enrichment followed by signal transduction and cell communication (Fig. S1). As a  
388 further demonstrative example, we investigated a scaffold that contained a high density of  
389 SNPs associated with PiGV resistance under these conditions (Fig. 5). After running a blast  
390 search on all genes on this scaffold we found a combination of developmental and metabolic  
391 genes interspersed with genes linked to viral and innate immunity as well as apoptosis  
392 (Table S2). Such linkage is suggestive of a pleiotropic effect or correlated selection, either of  
393 which could lead to the trade-off between immunity and development we observe.

394  
395  
396  
397  
398

399

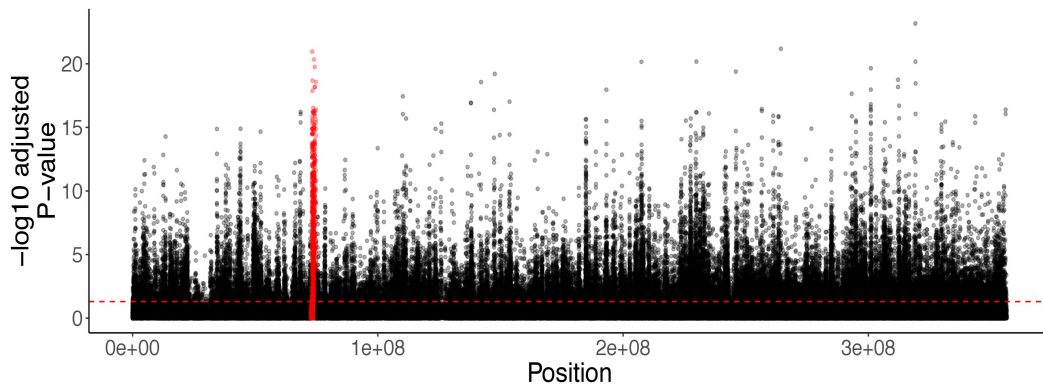

400

401 Figure 5. Manhattan plot of SNPs associated with resistance to PiGV on a low nutrition diet.  
402 Scaffold 23 is highlighted in red due to its high density of significantly associated SNPs. The  
403 putative functions of these genes are available in Table S2.

404

405

#### 406 *PiGV resistance is a polygenic trait*

407 The large number of SNPs associated with resistance in both the common garden and low  
408 nutrition diets suggests that resistance to PiGV infection is likely to be a highly polygenic  
409 trait. However, it is possible that the SNPs we associated with disease resistance are located  
410 in similar genomic regions, only appearing disparate due to the length of the scaffolds in our  
411 draft assembly. When we further assessed the proximity of SNPs, using improved scaffold  
412 lengths (increased from 0.5 to 5Mbp on average) from proximity-ligation sequencing we  
413 found many independent peaks of selection along the larger scaffolds (Fig. S2). This suggests  
414 that the genomic location of SNPs is not an artefact of the many small scaffolds that make  
415 up the assembly and that PiGV resistance is indeed a highly polygenic trait.

416

#### 417 *Larval populations show little underlying population structure*

418 Genome-wide association studies can lead to spurious correlations as a result of underlying  
419 population structure, where associations are a result of shared demographic history rather

420 than a signature of selection. Whilst our populations were all derived from a single ancestral  
421 population, that had been out crossed repeatedly prior to the selection experiment, it is  
422 possible that the observed differences in allele frequency were the result of an underlying  
423 population structure. To rule this out we used a Bayesian approach to identity population  
424 structure naively on independent subsets of the SNP data. We identified very weak  
425 population structure suggesting that our results are unlikely to be spurious and found no  
426 clustering of populations that would be indicative underlying population structure (Fig. S3).  
427 We also found high reproducibility of results independent of which subset was used,  
428 suggesting our methods were robust (FMD always < 0.6, see Gautier 2015).

429

## 430 **Discussion**

431

432 We used an evolve and re-sequence experiment (Schlötterer, Kofler, Versace, Tobler, &  
433 Franssen, 2015) to identify the resource dependence of the genetic basis of resistance to an  
434 insect DNA virus in an insect model system. We demonstrate that the evolution of resistance  
435 is diet specific, with populations selected on a nutrient limited diet utilising a different form  
436 of immunity. Surprisingly, we found no increase in resistance to PiGV exposure in  
437 populations selected on a high resource diet. In contrast, we found significantly higher  
438 survival in exposed populations selected on a low resource diet relative to controls.  
439 However, this effect was only apparent when such populations were assayed on a common  
440 garden diet, not when assayed on their low nutrition diet. Taken together, these results  
441 suggest that the resistance mechanism employed on low food is likely more complex than  
442 our bioassay can detect. For example, selection is acting on all life-stages during the

443 selection experiment, but our assay by necessity only tests resistance at the 3<sup>rd</sup> instar stage.  
444 This difference in resistance suggests that exposed populations selected on a low nutrient  
445 diet have evolved a low nutrition-specific resistance mechanism that is ineffective when  
446 reared and assayed on the common garden diet.

447

448 We also observed a trade-off between resistance and growth rate in nutrient limited  
449 populations. These results suggest that low nutrition environments may broadly limit the  
450 evolution of effective immune mechanisms. Whilst this nutrition-specific trade-off has been  
451 demonstrated before in two separate selection experiments (Boots & Begon, 1993; Boots,  
452 2011) and shown to be genetic by comparison amongst inbred lines (Bartlett, Wilfert, &  
453 Boots, 2018), ours is the first study to use whole-genome resequencing to identify the  
454 genetic basis of such resistance. This demonstrates the genomic basis of one of the most  
455 well characterized genotypic trade-offs that shapes resistance to pathogens.

456

457 Our genome scan for resistance of all populations, regardless of selection diet, identified a  
458 number of biological processes involved in resistance to PiGV. A well-established  
459 phenomenon in baculovirus infections is apoptosis following cellular infection (reviewed in  
460 Schultz & Friesen 2009; Rohrmann 2013) and is thought to be a key immune response given  
461 that many baculoviruses encode anti-apoptosis genes (Clem, Hardwick, & Miller, 1996),  
462 including PiGV (Harrison, Rowley, & Funk, 2016). Although we did not identify apoptosis  
463 genes directly, the most overrepresented biological process was calcium ion homeostasis,  
464 which has previously been linked with baculovirus induced apoptosis (Xiu, Peng, & Hong,  
465 2005). Other overrepresented biological processes include immune response and many

466 metabolic and regulatory processes. This is understandable given that after the rapid global  
467 shutdown of mRNA and protein production following baculovirus infection, energy  
468 metabolism escapes this shutdown (Nguyen, Nielsen, & Reid, 2013). As such, our findings are  
469 broadly in line with existing mechanisms described in high nutrition diet.

470

471 Interestingly, when we picked out a number of candidate SNPs for further investigation (Fig.  
472 3), we identified some potential targets for selection. Notably, SNP A (Fig. 3) encodes a  
473 mediator of RNA polymerase II transcription. This is of interest as all baculoviruses studied to  
474 date carry a protein that negatively regulates RNA polymerase II and is therefore likely to be  
475 a crucial component of baculovirus infectivity (Nguyen et al., 2013). We also identified a  
476 sodium and chloride dependent GABA transporter and a glycine receptor subunit, but it is  
477 difficult to link these to any specific baculovirus infection pathways. Finally, 3 of the  
478 candidates we selected were hypothetical proteins or in non-coding regions. This is  
479 potentially a result of working with a non-model organism for which genomic information is  
480 limited and may warrant further investigation.

481

482 As we identified a different phenotypic response in those populations selected on a low  
483 nutrition diet, we repeated the genome scan on just these populations to identify the  
484 putative resistance mechanism. In this instance, the most overrepresented biological  
485 process was cytoskeleton organization. This is interesting as baculoviruses are thought to  
486 manipulate the actin cytoskeleton during nucleocapsid transport and this is vital for  
487 successful infection and replication (Volkman, 2007). Baculoviruses use a cytoskeletal  
488 component (actin filaments) to both reach the nucleus and for transmission from the

489 nucleus following nucleocapsid production (Marek, Merten, Galibert, Vlak, & van Oers, 2011;  
490 Ohkawa, Volkman, & Welch, 2010). As such, there is likely to be strong selection on resisting  
491 such manipulations. Other overrepresented biological processes included signal  
492 transduction, cell communication and cellular process. Furthermore, when we selected a  
493 single scaffold (scaffold 23) that was highly correlated with resistance in a low nutrition  
494 environment, we found it includes genes for innate immunity, intracellular virus transport,  
495 apoptosis and development (GO terms, see table S1). The close genetic linkage of such genes  
496 goes some way to explain the trade-off between resistance and development we observed.  
497 Finally, the disparity we see between resistance on a high nutrition diet vs. a nutrient limited  
498 diet suggests that under nutrient limitation, insects are forced to invest in intracellular  
499 resistance mechanisms that are traded off against growth rate. This is reinforced by our  
500 development data, where we find a much weaker trade-off when the same nutrient limited  
501 populations are assayed on a high-quality diet.

502

503 The number of SNPs correlated with observed resistance suggests that resistance is highly  
504 polygenic. To verify this, we used Hi-C scaffolding to improve scaffold lengths and still found  
505 many independent regions correlated with resistance. Taken together, this suggests that  
506 that resistance on both diets is a highly polygenic trait. A number of complex traits have  
507 previously been found to be highly polygenic in insects (Jha et al., 2015; Kang, Aggarwal,  
508 Rashkovetsky, Korol, & Michalak, 2016), suggesting that the mechanism of resistance in our  
509 system may also be complex, rather than a small number of typical immune genes as is  
510 typical in RNA virus immunity (Magwire et al., 2012). A recent study reports that a complex  
511 genetic architecture of many interacting genes can lead to genetic redundancy, with many



512 competing beneficial alleles thus allowing rapid evolutionary responses. As such, it may be  
513 adaptive to rely on the complexity of polygenic traits (Barghi et al., 2018).

514

515 We have demonstrated that adaptation to a low nutrient diet can have profound effects on  
516 the underlying genetic architecture of virus resistance. We highlight a potential trade-off at  
517 the molecular level and describe putative resistance mechanisms that vary by diet. Our pool-  
518 seq approach has allowed a high level of replication at the population level and provided  
519 insights into the genetic nature of resistance. Further work will be required to fully  
520 characterize these mechanisms and functional validation of mutants in genome edited  
521 insects may soon be possible. Our results have implications for understanding wild insect  
522 populations and more broadly the role of nutrition across environments on pathogen  
523 resistance.

524

#### 525 **Acknowledgements**

526 SM and KR were supported by a NERC (UK) grant NE/J009784/1 awarded to MB and SP.

527

#### 528 **Data Availability**

529 The data that support the findings of this study will be openly available in DataDryad prior to  
530 publication. Sequence data is available from the European Bioinformatics Institute (EBI),  
531 under accession number PRJEB27964.

532

533

#### 534 **References**

535 Antonovics, J., & Thrall, P. H. (1994). The Cost of Resistance and the Maintenance of Genetic  
536 Polymorphism in Host-Pathogen Systems. *Proceedings of the Royal Society B: Biological*

- 537 *Sciences*, 257(1349), 105–110. <http://doi.org/10.1098/rspb.1994.0101>
- 538 Barghi, N., Tobler, R., Nolte, V., Jaksic, A. M., Mallard, F., Otte, K., ... Schloetterer, C. (2018).  
539 Polygenic adaptation fuels genetic redundancy in *Drosophila*. *BioRxiv*, 332122.  
540 <http://doi.org/10.1101/332122>
- 541 Bartlett, L. J., Wilfert, L., & Boots, M. (2018). A genotypic trade-off between constitutive  
542 resistance to viral infection and host growth rate. *Evolution*, 72(12), 2749–2757.  
543 <http://doi.org/10.1111/evo.13623>
- 544 Boetzer, M., Henkel, C. V., Jansen, H. J., Butler, D., & Pirovano, W. (2011). Scaffolding pre-  
545 assembled contigs using SSPACE. *Bioinformatics*, 27(4), 578–579.  
546 <http://doi.org/10.1093/bioinformatics/btq683>
- 547 Boots, M. (2011). The Evolution of Resistance to a Parasite Is Determined by Resources. *The*  
548 *American Naturalist*, 178(2), 214–220. <http://doi.org/10.1086/660833>
- 549 Boots, M., & Begon, M. (1993). Trade-offs with resistance to a granulosis virus in the Indian  
550 meal moth, examined by a laboratory evolution experiment. *Functional Ecology*.  
551 Boots, M., & Begon, M. (1993). Trade-Offs with Resistance to a Granulosis Virus in the Indian  
552 Meal Moth, Examined by a Laboratory Evolution Experiment. *Functional Ecology*, 7(5),  
553 528. <http://doi.org/10.2307/2390128>
- 554 Boots, M., & Begon, M. (1994). Resource limitation and the lethal and sublethal effects of a  
555 viral pathogen in the Indian meal moth, *Plodia interpunctella*. *Ecological Entomology*.
- 556 Boots, M., & Haraguchi, Y. (1999). The Evolution of Costly Resistance in Host-Parasite  
557 Systems. *The American Naturalist*, 153(4), 359–370. <http://doi.org/10.1086/303181>
- 558 Boots, M., & Roberts, K. E. (2012). Maternal effects in disease resistance: poor maternal  
559 environment increases offspring resistance to an insect virus. *Proceedings of the Royal*  
560 *Society of London B: Biological Sciences*, 279(1744).
- 561 Bowers, R., Boots, M., the, M. B.-P. of, & 1994, undefined. (n.d.). Life-history trade-offs and  
562 the evolution of pathogen resistance: competition between host strains.  
563 *Royalsocietypublishing.Org*.
- 564 Cantarel, B. L., Korf, I., Robb, S. M. C., Parra, G., Ross, E., Moore, B., ... Yandell, M. (2008).  
565 MAKER: an easy-to-use annotation pipeline designed for emerging model organism  
566 genomes. *Genome Research*, 18(1), 188–96. <http://doi.org/10.1101/gr.6743907>
- 567 Clem, R. J., Hardwick, J. M., & Miller, L. K. (1996). Anti-apoptotic genes of baculoviruses. *Cell*  
568 *Death and Differentiation*, 3(1), 9–16.
- 569 Cotter, S. C., Simpson, S. J., Raubenheimer, D., & Wilson, K. (2011). Macronutrient balance  
570 mediates trade-offs between immune function and life history traits. *Functional*  
571 *Ecology*, 25(1), 186–198. <http://doi.org/10.1111/j.1365-2435.2010.01766.x>
- 572 Curtis, V., de Barra, M., & Aunger, R. (2011). Disgust as an adaptive system for disease  
573 avoidance behaviour. *Philosophical Transactions of the Royal Society of London. Series*  
574 *B, Biological Sciences*, 366(1563), 389–401. <http://doi.org/10.1098/rstb.2010.0117>
- 575 d. C. LOPEZ-PASCUA, L., & BUCKLING, A. (2008). Increasing productivity accelerates host-  
576 parasite coevolution. *Journal of Evolutionary Biology*, 21(3), 853–860.  
577 <http://doi.org/10.1111/j.1420-9101.2008.01501.x>
- 578 Eoche-Bosy, D., Gautier, M., Esquibet, M., Legeai, F., Bretaudeau, A., Bouchez, O., ...  
579 Montarry, J. (2017). Genome scans on experimentally evolved populations reveal  
580 candidate regions for adaptation to plant resistance in the potato cyst nematode  
581 *Globodera pallida*. *Molecular Ecology*, 26(18), 4700–4711.

- 582 <http://doi.org/10.1111/mec.14240>
- 583 Förstner, W., & Moonen, B. (2003). A Metric for Covariance Matrices. In *Geodesy-The*  
584 *Challenge of the 3rd Millennium* (pp. 299–309). Berlin, Heidelberg: Springer Berlin  
585 Heidelberg. [http://doi.org/10.1007/978-3-662-05296-9\\_31](http://doi.org/10.1007/978-3-662-05296-9_31)
- 586 Fuxa, J. R., & Richter, A. R. (1992). Virulence and multigeneration passage of a nuclear  
587 polyhedrosis virus selected for an increased rate of vertical transmission. *Biological*  
588 *Control*, 2(3), 171–175. [http://doi.org/10.1016/1049-9644\(92\)90055-l](http://doi.org/10.1016/1049-9644(92)90055-l)
- 589 Gautier, M. (2015). Genome-Wide Scan for Adaptive Divergence and Association with  
590 Population-Specific Covariates. *Genetics*, 201(4), 1555–1579.  
591 <http://doi.org/10.1534/genetics.115.181453>
- 592 Gómez, P., Bennie, J., Gaston, K. J., & Buckling, A. (2015). The Impact of Resource Availability  
593 on Bacterial Resistance to Phages in Soil. *PLOS ONE*, 10(4), e0123752.  
594 <http://doi.org/10.1371/journal.pone.0123752>
- 595 Graham, A. L., Allen, J. E., & Read, A. F. (2005). Evolutionary Causes and Consequences of  
596 Immunopathology. *Annual Review of Ecology, Evolution, and Systematics*, 36(1), 373–  
597 397. <http://doi.org/10.1146/annurev.ecolsys.36.102003.152622>
- 598 Harrison, R., Rowley, D., & Funk, C. (2016). The Complete Genome Sequence of *Plodia*  
599 *interpunctella* Granulovirus: Evidence for Horizontal Gene Transfer and Discovery of an  
600 Unusual Inhibitor-of-. *PLoS One*.
- 601 Jha, A. R., Miles, C. M., Lippert, N. R., Brown, C. D., White, K. P., & Kreitman, M. (2015).  
602 Whole-Genome Resequencing of Experimental Populations Reveals Polygenic Basis of  
603 Egg-Size Variation in *Drosophila melanogaster*. *Molecular Biology and Evolution*, 32(10),  
604 2616–2632. <http://doi.org/10.1093/molbev/msv136>
- 605 Joshi, N., & Fass, J. (2011). Sickle: A sliding-window, adaptive, quality-based trimming tool  
606 for FastQ files.
- 607 Juneja, P., & Lazzaro, B. P. (2009). Population genetics of insect immune responses. In *Insect*  
608 *Infection and Immunity* (pp. 206–224). Oxford University Press.  
609 <http://doi.org/10.1093/acprof:oso/9780199551354.003.0013>
- 610 Kang, L., Aggarwal, D. D., Rashkovetsky, E., Korol, A. B., & Michalak, P. (2016). Rapid genomic  
611 changes in *Drosophila melanogaster* adapting to desiccation stress in an experimental  
612 evolution system. *BMC Genomics*, 17(1), 233. <http://doi.org/10.1186/s12864-016-2556->  
613 [y](http://doi.org/10.1186/s12864-016-2556-y)
- 614 Knutie, S. A., Wilkinson, C. L., Wu, Q. C., Ortega, C. N., & Rohr, J. R. (2017). Host resistance  
615 and tolerance of parasitic gut worms depend on resource availability. *Oecologia*,  
616 183(4), 1031–1040. <http://doi.org/10.1007/s00442-017-3822-7>
- 617 Kofler, R., Langmüller, A. M., Nouhaid, P., Otte, K. A., & Schlötterer, C. (2016). Suitability of  
618 Different Mapping Algorithms for Genome-wide Polymorphism Scans with Pool-Seq  
619 Data. *G3 (Bethesda, Md.)*, 6(11), 3507–3515. <http://doi.org/10.1534/g3.116.034488>
- 620 Kraaijeveld, A. R., & Godfray, H. C. (1997). Trade-off between parasitoid resistance and larval  
621 competitive ability in *Drosophila melanogaster*. *Nature*, 389(6648), 278–80.  
622 <http://doi.org/10.1038/38483>
- 623 Langmead, B., & Salzberg, S. L. (2012). Fast gapped-read alignment with Bowtie 2. *Nature*  
624 *Methods*, 9(4), 357–359. <http://doi.org/10.1038/nmeth.1923>
- 625 Lochmiller, R. L., & Deerenberg, C. (2000). Trade-offs in evolutionary immunology: just what  
626 is the cost of immunity? *Oikos*, 88(1), 87–98. <http://doi.org/10.1034/j.1600->

- 627 0706.2000.880110.x
- 628 Magwire, M. M., Fabian, D. K., Schweyen, H., Cao, C., Longdon, B., Bayer, F., & Jiggins, F. M.  
629 (2012). Genome-Wide Association Studies Reveal a Simple Genetic Basis of Resistance  
630 to Naturally Coevolving Viruses in *Drosophila melanogaster*. *PLoS Genetics*, *8*(11),  
631 e1003057. <http://doi.org/10.1371/journal.pgen.1003057>
- 632 Marek, M., Merten, O.-W., Galibert, L., Vlak, J. M., & van Oers, M. M. (2011). Baculovirus  
633 VP80 protein and the F-actin cytoskeleton interact and connect the viral replication  
634 factory with the nuclear periphery. *Journal of Virology*, *85*(11), 5350–62.  
635 <http://doi.org/10.1128/JVI.00035-11>
- 636 Martin, M. (2011). Cutadapt removes adapter sequences from high-throughput sequencing  
637 reads. *EMBnet.Journal*, *17*(1), 10. <http://doi.org/10.14806/ej.17.1.200>
- 638 Martins, N. E., Faria, V. G., Nolte, V., Schlötterer, C., Teixeira, L., Sucena, É., & Magalhães, S.  
639 (2014). Host adaptation to viruses relies on few genes with different cross-resistance  
640 properties. *Proceedings of the National Academy of Sciences of the United States of*  
641 *America*, *111*(16), 5938–43. <http://doi.org/10.1073/pnas.1400378111>
- 642 McKean, K. A., Yourth, C. P., Lazzaro, B. P., & Clark, A. G. (2008). The evolutionary costs of  
643 immunological maintenance and deployment. *BMC Evolutionary Biology*, *8*(1), 76.  
644 <http://doi.org/10.1186/1471-2148-8-76>
- 645 Michalak, P., Kang, L., Sarup, P. M., Schou, M. F., & Loeschcke, V. (2017). Nucleotide diversity  
646 inflation as a genome-wide response to experimental lifespan extension in *Drosophila*  
647 *melanogaster*. *BMC Genomics*, *18*(1), 84. <http://doi.org/10.1186/s12864-017-3485-0>
- 648 Moret, Y., & Schmid-Hempel, P. (2000). Survival for immunity: the price of immune system  
649 activation for bumblebee workers. *Science (New York, N.Y.)*, *290*(5494), 1166–8.
- 650 Nguyen, Q., Nielsen, L., & Reid, S. (2013). Genome Scale Transcriptomics of Baculovirus-  
651 Insect Interactions. *Viruses*, *5*(11), 2721–2747. <http://doi.org/10.3390/v5112721>
- 652 Ohkawa, T., Volkman, L. E., & Welch, M. D. (2010). Actin-based motility drives baculovirus  
653 transit to the nucleus and cell surface. *The Journal of Cell Biology*, *190*(2).
- 654 Putnam, N. H., O'Connell, B. L., Stites, J. C., Rice, B. J., Blanchette, M., Calef, R., ... Green, R. E.  
655 (2016). Chromosome-scale shotgun assembly using an in vitro method for long-range  
656 linkage. *Genome Research*, *26*(3), 342–50. <http://doi.org/10.1101/gr.193474.115>
- 657 Raberg, L., Graham, A. L., & Read, A. F. (2009). Decomposing health: tolerance and  
658 resistance to parasites in animals. *Philosophical Transactions of the Royal Society B:*  
659 *Biological Sciences*, *364*(1513), 37–49. <http://doi.org/10.1098/rstb.2008.0184>
- 660 Rohrmann, G. (2013). Baculovirus infection: The cell cycle and apoptosis.
- 661 Sadd, B. M., & Siva-Jothy, M. T. (2006). Self-harm caused by an insect's innate immunity.  
662 *Proceedings of the Royal Society B: Biological Sciences*, *273*(1600), 2571–2574.  
663 <http://doi.org/10.1098/rspb.2006.3574>
- 664 Schlötterer, C., Kofler, R., Versace, E., Tobler, R., & Franssen, S. U. (2015). Combining  
665 experimental evolution with next-generation sequencing: a powerful tool to study  
666 adaptation from standing genetic variation. *Heredity*, *114*(5), 431–440.  
667 <http://doi.org/10.1038/hdy.2014.86>
- 668 Schlötterer, C., Tobler, R., Kofler, R., & Nolte, V. (2014). Sequencing pools of individuals —  
669 mining genome-wide polymorphism data without big funding. *Nature Reviews Genetics*,  
670 *15*(11), 749–763. <http://doi.org/10.1038/nrg3803>
- 671 Schultz, K. L. W., & Friesen, P. D. (2009). Baculovirus DNA replication-specific expression

672 factors trigger apoptosis and shutoff of host protein synthesis during infection. *Journal*  
673 *of Virology*, 83(21), 11123–32. <http://doi.org/10.1128/JVI.01199-09>  
674 Shahrestani, P., Burke, M. K., Birse, R., Kezos, J. N., Ocorr, K., Mueller, L. D., ... Bodmer, R.  
675 (2017). Experimental Evolution and Heart Function in *Drosophila*. *Physiological and*  
676 *Biochemical Zoology : PBZ*, 90(2), 281–293. <http://doi.org/10.1086/689288>  
677 Turner, T. L., & Miller, P. M. (2012). Investigating natural variation in *Drosophila* courtship  
678 song by the evolve and resequence approach. *Genetics*, 191(2), 633–42.  
679 <http://doi.org/10.1534/genetics.112.139337>  
680 Volkman, L. E. (2007). Baculovirus infectivity and the actin cytoskeleton. *Current Drug*  
681 *Targets*, 8(10), 1075–83.  
682 Xiu, M., Peng, J., & Hong, H. (2005). Mitochondrial response and calcium ion change in  
683 apoptotic insect cells induced by SfaMNPV. *Chinese Science Bulletin*, 50(12), 1191–  
684 1198. <http://doi.org/10.1007/BF03183692>  
685  
686  
687  
688
